# Supplementary material for: Adipocytes disrupt the translational programme of acute lymphoblastic leukaemia to favour tumour survival and persistence
Source: PubMed Central journal article supplement (PMC8448863; doi:10.1038/s41467-021-25540-4), 2021-09-17
Supplement: 41467_2021_25540_MOESM2_ESM.pdf [file 41467_2021_25540_MOESM2_ESM.pdf]

## Reporting Summary

Nature Research wishes to improve the reproducibility of the work that we publish. This form provides structure for consistency and transparency in reporting. For further information on Nature Research policies, see our [Editorial Policies](#) and the [Editorial Policy Checklist](#).

### Statistics

For all statistical analyses, confirm that the following items are present in the figure legend, table legend, main text, or Methods section.

n/a Confirmed

- The exact sample size ( $n$ ) for each experimental group/condition, given as a discrete number and unit of measurement
- A statement on whether measurements were taken from distinct samples or whether the same sample was measured repeatedly
- The statistical test(s) used AND whether they are one- or two-sided  
*Only common tests should be described solely by name; describe more complex techniques in the Methods section.*
- A description of all covariates tested
- A description of any assumptions or corrections, such as tests of normality and adjustment for multiple comparisons
- A full description of the statistical parameters including central tendency (e.g. means) or other basic estimates (e.g. regression coefficient) AND variation (e.g. standard deviation) or associated estimates of uncertainty (e.g. confidence intervals)
- For null hypothesis testing, the test statistic (e.g.  $F$ ,  $t$ ,  $r$ ) with confidence intervals, effect sizes, degrees of freedom and  $P$  value noted  
*Give  $P$  values as exact values whenever suitable.*
- For Bayesian analysis, information on the choice of priors and Markov chain Monte Carlo settings
- For hierarchical and complex designs, identification of the appropriate level for tests and full reporting of outcomes
- Estimates of effect sizes (e.g. Cohen's  $d$ , Pearson's  $r$ ), indicating how they were calculated

*Our web collection on [statistics for biologists](#) contains articles on many of the points above.*

### Software and code

Policy information about [availability of computer code](#)

Data collection

Data analysis

For manuscripts utilizing custom algorithms or software that are central to the research but not yet described in published literature, software must be made available to editors and reviewers. We strongly encourage code deposition in a community repository (e.g. GitHub). See the Nature Research [guidelines for submitting code & software](#) for further information.

### Data

Policy information about [availability of data](#)

All manuscripts must include a [data availability statement](#). This statement should provide the following information, where applicable:

- Accession codes, unique identifiers, or web links for publicly available datasets
- A list of figures that have associated raw data
- A description of any restrictions on data availability

### Field-specific reporting

# Life sciences study design

All studies must disclose on these points even when the disclosure is negative.

|                 |                                                                                                                                                                                                                                                                                                                             |
|-----------------|-----------------------------------------------------------------------------------------------------------------------------------------------------------------------------------------------------------------------------------------------------------------------------------------------------------------------------|
| Sample size     | No formal sample size calculations were performed. The experimental designs were based on known biological variance of the cell lines and statistical feasibility. In the case of in vivo work, previous experience with engraftment success was used to calculate appropriate cohort size whilst minimising animal excess. |
| Data exclusions | No data exclusions to declare                                                                                                                                                                                                                                                                                               |
| Replication     | Where feasible, reproducibility was confirmed by ensuring appropriate numbers of technical replicates in addition to performing independent experiments. For primary specimens, multiple biologically independent tissues were assessed                                                                                     |
| Randomization   | Randomisations were not applicable for the design of our experiments                                                                                                                                                                                                                                                        |
| Blinding        | Although formal blinding was not performed due to the nature of the studies involved, technical execution of experiments were largely separate to data analysis thereby avoiding a differential treatment effect at the outset.                                                                                             |

## Reporting for specific materials, systems and methods

We require information from authors about some types of materials, experimental systems and methods used in many studies. Here, indicate whether each material, system or method listed is relevant to your study. If you are not sure if a list item applies to your research, read the appropriate section before selecting a response.

### Materials & experimental systems

| n/a                                 | Involved in the study                                           |
|-------------------------------------|-----------------------------------------------------------------|
| <input type="checkbox"/>            | <input checked="" type="checkbox"/> Antibodies                  |
| <input type="checkbox"/>            | <input checked="" type="checkbox"/> Eukaryotic cell lines       |
| <input checked="" type="checkbox"/> | <input type="checkbox"/> Palaeontology and archaeology          |
| <input type="checkbox"/>            | <input checked="" type="checkbox"/> Animals and other organisms |
| <input checked="" type="checkbox"/> | <input type="checkbox"/> Human research participants            |
| <input type="checkbox"/>            | <input checked="" type="checkbox"/> Clinical data               |
| <input checked="" type="checkbox"/> | <input type="checkbox"/> Dual use research of concern           |

### Methods

| n/a                                 | Involved in the study                              |
|-------------------------------------|----------------------------------------------------|
| <input checked="" type="checkbox"/> | <input type="checkbox"/> ChIP-seq                  |
| <input type="checkbox"/>            | <input checked="" type="checkbox"/> Flow cytometry |
| <input checked="" type="checkbox"/> | <input type="checkbox"/> MRI-based neuroimaging    |

## Antibodies

|                 |                                                                                                                                                                                                                                                                                                                                                                                                                                                                                                                                                                                                                                                                                                                                                                                                                                                                                                                                                                                                                                                                                                                                                                                                                                                                                                                                                                                                                                                                                                                                                                                                                                                                                                                                                                                      |
|-----------------|--------------------------------------------------------------------------------------------------------------------------------------------------------------------------------------------------------------------------------------------------------------------------------------------------------------------------------------------------------------------------------------------------------------------------------------------------------------------------------------------------------------------------------------------------------------------------------------------------------------------------------------------------------------------------------------------------------------------------------------------------------------------------------------------------------------------------------------------------------------------------------------------------------------------------------------------------------------------------------------------------------------------------------------------------------------------------------------------------------------------------------------------------------------------------------------------------------------------------------------------------------------------------------------------------------------------------------------------------------------------------------------------------------------------------------------------------------------------------------------------------------------------------------------------------------------------------------------------------------------------------------------------------------------------------------------------------------------------------------------------------------------------------------------|
| Antibodies used | <p>Primary antibodies were purchased from Cell Signaling Technology: P21 (12D1, 2947), P27 (D69C12, 3686), phospho-P53 (Ser46, 2521), Cyclin D1 (E3P5S, 55506), Cyclin E (HE12, 4129), phospho-Rb (Ser807/811, 8516), E2F-1 (3742), Phospho-AMPK (Thr172, 2531), Phospho-mTOR (Ser2448; 2971), Phospho-S6 Ribosomal Protein (Ser235/236; 2211), S6 Ribosomal Protein (5G10; 2217), Phospho-4EBP1 (Thr37/46; 2855), 4EBP1 (53H11; 9644), Phospho-eIF2<math>\alpha</math> (Ser51; 9721), eIF2<math>\alpha</math> (9722) and ATF4 (D4B8; 11815). The anti <math>\alpha</math>-Tubulin antibody was purchased from Abcam (DM1A; ab7291).</p> <p>CD45-FITC (clone 2D1; 345808, BD Biosciences)<br/>           CD10-FITC (clone W8E7; 347503, BD Biosciences)<br/>           CD36-APC (clone CB38; 550956, BD Biosciences)<br/>           CD10-APC (clone HI10a 332777 BD Biosciences)<br/>           CD34-APC (clone ; 555824 BD Biosciences)<br/>           CD33-PE (clone WM53; 555450, BD Biosciences)<br/>           BODIPY™ 493/503 (4,4-Difluoro-1,3,5,7,8-Pentamethyl-4-Bora-3a,4a-Diaza-s-Indacene) (D3922, Thermo Fisher Scientific)<br/>           Ki67-FITC (556026, BD Biosciences)<br/>           Fixable Viability Dye eFluor™ 780 (65-0865-14, Thermo Fisher Scientific)<br/>           CD19-PE (clone 4G7; 345777, BD Biosciences)<br/>           Annexin V-Alexa Fluor 647 (A23204, Thermo Fisher Scientific)<br/>           CountBright™ Absolute Counting Beads (C36950, Thermo Fisher Scientific)<br/>           DAPI (D3571, Thermo Fisher Scientific).<br/>           CD79a (clone SP18, Roche),<br/>           CD34 (QBend 10, Roche),<br/>           CD22 (clone SP104, Roche),<br/>           Tdt (5267811001, Roche)<br/>           PAX5 (EPR3730, Abcam,).</p> |
| Validation      | Manufacturer validations were accepted and were further confirmed against the known biology, clinical diagnostic data and performance of the antibody for example against experimental controls and molecular weight ladders.                                                                                                                                                                                                                                                                                                                                                                                                                                                                                                                                                                                                                                                                                                                                                                                                                                                                                                                                                                                                                                                                                                                                                                                                                                                                                                                                                                                                                                                                                                                                                        |

## Eukaryotic cell lines

Policy information about [cell lines](#)

|                                                                      |                                                                                                                               |
|----------------------------------------------------------------------|-------------------------------------------------------------------------------------------------------------------------------|
| Cell line source(s)                                                  | Nalm-6 ATCC<br>3T3-L1 (CL-173) from ATCC<br>Nalm-6 from ATCC<br>REH from ATCC<br>RS4;11 from ATCC                             |
| Authentication                                                       | Low passage cell lines from commercial sources were used for all studies. As such additional authentication was not performed |
| Mycoplasma contamination                                             | Was serially negative                                                                                                         |
| Commonly misidentified lines<br>(See <a href="#">ICLAC</a> register) | Not applicable                                                                                                                |

## Animals and other organisms

Policy information about [studies involving animals](#); [ARRIVE guidelines](#) recommended for reporting animal research

|                         |                                                                                                                                                                                                                                                                                                                        |
|-------------------------|------------------------------------------------------------------------------------------------------------------------------------------------------------------------------------------------------------------------------------------------------------------------------------------------------------------------|
| Laboratory animals      | immunodeficient NSG strains                                                                                                                                                                                                                                                                                            |
| Wild animals            | Not applicable                                                                                                                                                                                                                                                                                                         |
| Field-collected samples | Not applicable                                                                                                                                                                                                                                                                                                         |
| Ethics oversight        | All animal experiments were performed under license PPL 70/8540 approved by the Home Office of the United Kingdom and in accordance with institutional guidelines. Clinical samples and data collection for research use were approved under NRES Committee London; City & East Research Ethics Committee 10/H0704/65. |

Note that full information on the approval of the study protocol must also be provided in the manuscript.

## Clinical data

Policy information about [clinical studies](#)

All manuscripts should comply with the ICMJE [guidelines for publication of clinical research](#) and a completed [CONSORT checklist](#) must be included with all submissions.

|                             |                |
|-----------------------------|----------------|
| Clinical trial registration | Not applicable |
| Study protocol              | Not applicable |
| Data collection             | Not applicable |
| Outcomes                    | Not applicable |

## Flow Cytometry

### Plots

Confirm that:

- The axis labels state the marker and fluorochrome used (e.g. CD4-FITC).
- The axis scales are clearly visible. Include numbers along axes only for bottom left plot of group (a 'group' is an analysis of identical markers).
- All plots are contour plots with outliers or pseudocolor plots.
- A numerical value for number of cells or percentage (with statistics) is provided.

### Methodology

|                           |                                                                                                                                                                                               |
|---------------------------|-----------------------------------------------------------------------------------------------------------------------------------------------------------------------------------------------|
| Sample preparation        | Single cell suspensions were subjected to Antibody staining performed for 15 min, protected from light. DAPI (1:2,000 in DPBS containing 2% FBS) was added prior to flow cytometric analysis. |
| Instrument                | LSRFortessa™ flow cytometer (BD Biosciences). Data were analysed by FlowJo (version 10.1, Tree Star).                                                                                         |
| Software                  | Data were analysed by FlowJo (version 10.1, Tree Star).                                                                                                                                       |
| Cell population abundance | Not applicable                                                                                                                                                                                |

Gating strategy

Gates were set up to exclude doublets, non-viable cells (DAPI+ or Fixable Viability Dye+) and isotype-stained populations.

Tick this box to confirm that a figure exemplifying the gating strategy is provided in the Supplementary Information.
